# Supplementary material for: Prognostic assessment capability of a five-gene signature in pancreatic cancer: a machine learning based-study
Source: Springer Nature journal article supplement (doi:10.1186/s12876-023-02700-y), 2023-03-11
Supplement: MOESM1 [file 24613132]

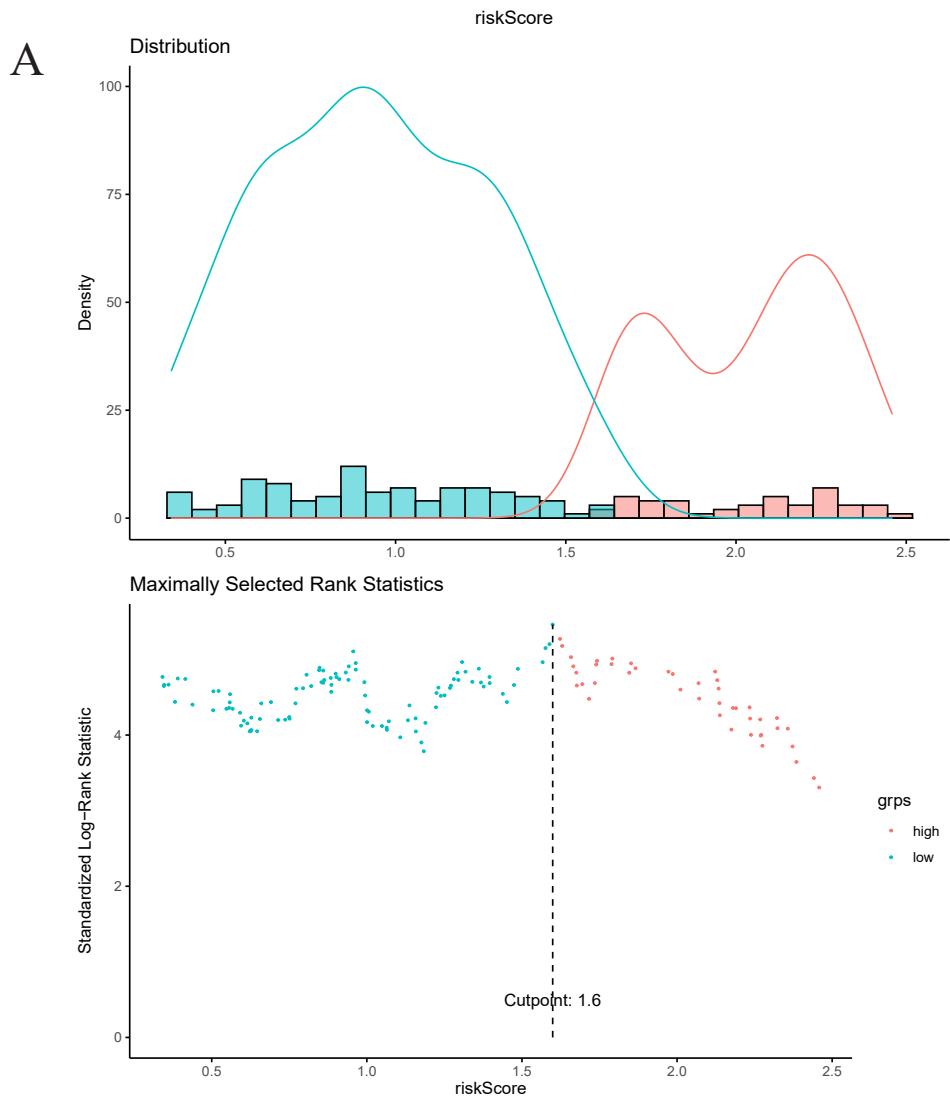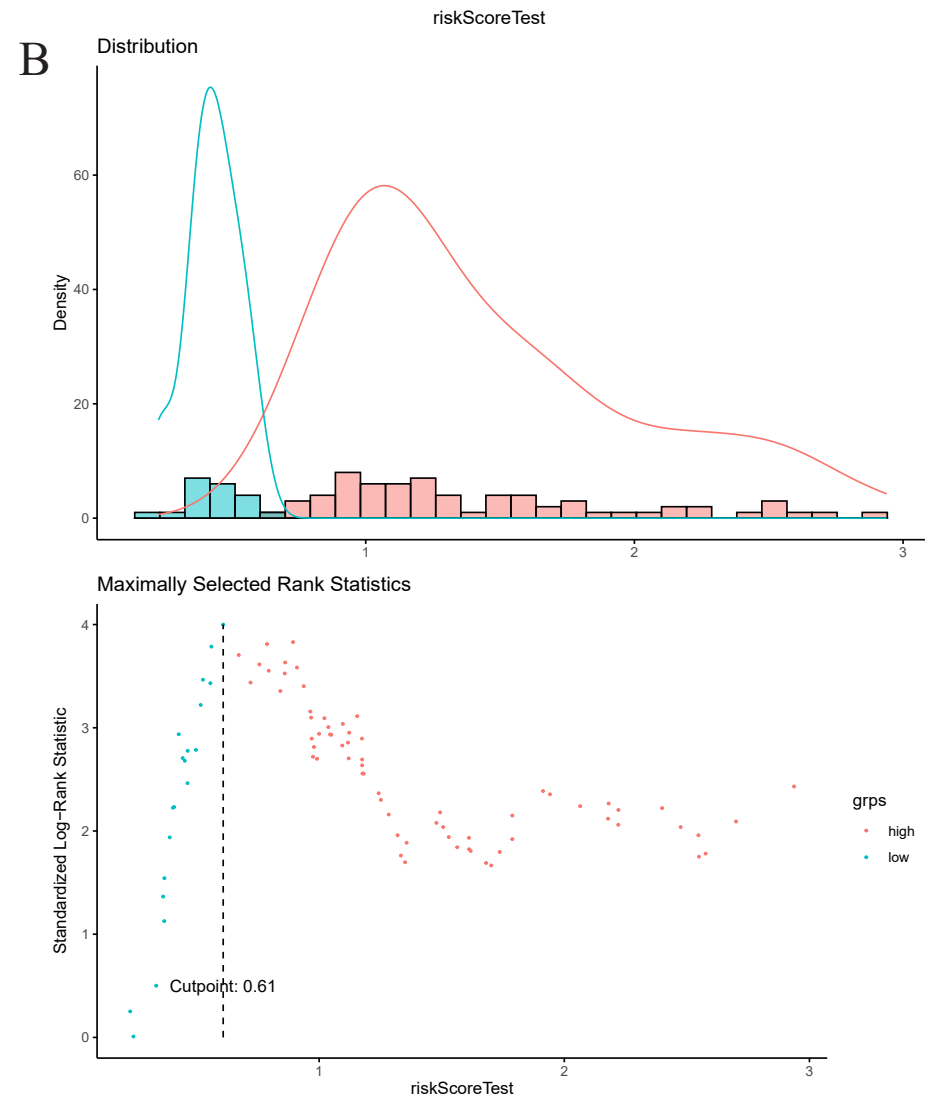

Supplementary figure 1: Pancreatic cancer patients were divided into high-risk and low-risk groups according to the cut-off values which were calculated with Kaplan-Meier method. (A) Cut-off value in training dataset (1.6). (B) Cut-off value in validation dataset (0.61).
