# Supplementary material for: Prognostic assessment capability of a five-gene signature in pancreatic cancer: a machine learning based-study
Source: Springer Nature journal article supplement (doi:10.1186/s12876-023-02700-y), 2023-03-11
Supplement: MOESM2 [file 24613132]

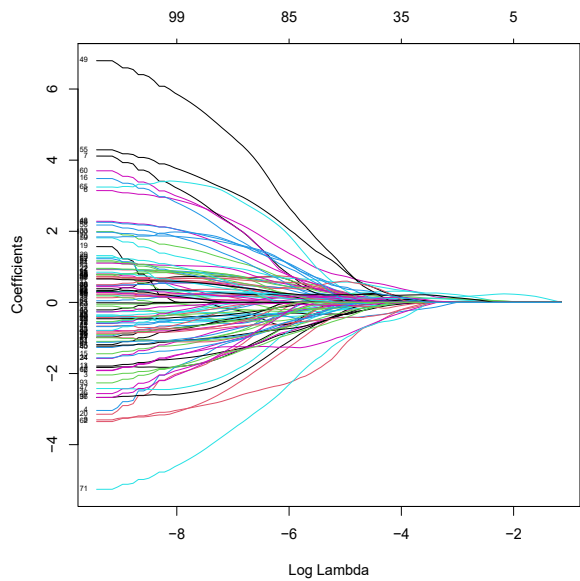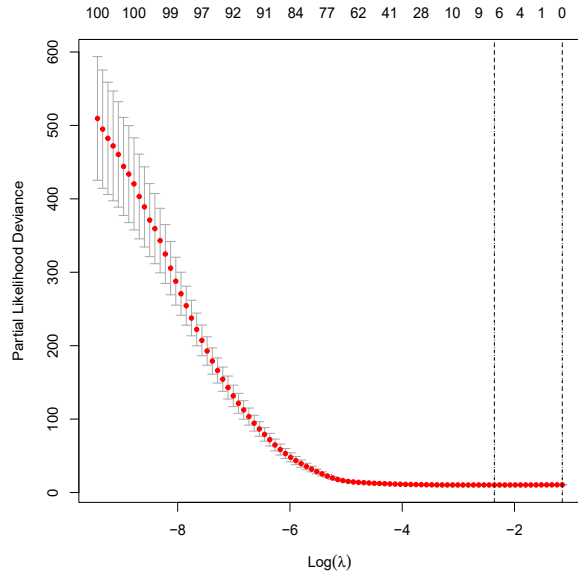

Supplementary figure 2: Lasso regression for variable screening.
