# Supplementary material for: Prognostic assessment capability of a five-gene signature in pancreatic cancer: a machine learning based-study
Source: Springer Nature journal article supplement (doi:10.1186/s12876-023-02700-y), 2023-03-11
Supplement: MOESM3 [file 24613132]

Supplementary table 1: The table of Gaussian mixture model cluster analysis result.

| model | mu       | sigma | n.mrn | mdcut |
|-------|----------|-------|-------|-------|
| 1     | 0.654729 | 1     | 1     | 1     |
| 2     | 0.687772 | 1     | 1     | 1     |
| 3     | 0.679508 | 1     | 1     | 1     |
| 4     | 0.663853 | 1     | 1     | 1     |
| 5     | 0.695819 | 1     | 1     | 1     |
| 6     | 0.691824 | 1     | 1     | 1     |
| 7     | 0.651644 | 1     | 1     | 1     |
| 8     | 0.684075 | 1     | 1     | 1     |
| 9     | 0.698601 | 2     | 1     | 1     |
| 10    | 0.70594  | 2     | 1     | 1     |
| 11    | 0.677292 | 2     | 1     | 1     |
| 12    | 0.710652 | 2     | 1     | 1     |
| 13    | 0.698885 | 2     | 1     | 1     |
| 14    | 0.671845 | 2     | 1     | 1     |
| 15    | 0.678384 | 2     | 1     | 1     |
| 16    | 0.698461 | 2     | 1     | 1     |
| 17    | 0.691598 | 2     | 1     | 1     |
| 18    | 0.718449 | 2     | 1     | 1     |
| 19    | 0.687965 | 2     | 1     | 1     |
| 20    | 0.719061 | 2     | 1     | 1     |
| 21    | 0.681336 | 2     | 1     | 1     |
| 22    | 0.68734  | 2     | 1     | 1     |
| 23    | 0.693239 | 2     | 2     | 2     |
| 24    | 0.705597 | 2     | 2     | 2     |
| 25    | 0.711084 | 2     | 2     | 2     |
| 26    | 0.685727 | 2     | 2     | 2     |
| 27    | 0.701125 | 2     | 2     | 2     |
| 28    | 0.687688 | 2     | 2     | 2     |
| 29    | 0.68575  | 2     | 2     | 2     |
| 30    | 0.68104  | 2     | 2     | 2     |
| 31    | 0.702332 | 2     | 2     | 2     |
| 32    | 0.711377 | 2     | 2     | 2     |
| 33    | 0.690884 | 2     | 2     | 2     |
| 34    | 0.73973  | 2     | 4     | 4     |
| 35    | 0.687017 | 2     | 2     | 2     |
| 36    | 0.644371 | 2     | 1     | 1     |
| 37    | 0.714483 | 3     | 3     | 3     |
| 38    | 0.694672 | 3     | 3     | 3     |
| 39    | 0.738339 | 3     | 3     | 3     |
| 40    | 0.698804 | 3     | 3     | 3     |
| 41    | 0.72743  | 3     | 3     | 3     |
| 42    | 0.696283 | 3     | 3     | 3     |
| 43    | 0.708116 | 3     | 3     | 3     |
| 44    | 0.718176 | 3     | 3     | 3     |
| 45    | 0.70745  | 3     | 3     | 3     |
| 46    | 0.726985 | 3     | 3     | 3     |
| 47    | 0.717334 | 3     | 3     | 3     |
| 48    | 0.706039 | 3     | 3     | 3     |
| 49    | 0.70207  | 3     | 3     | 3     |
| 50    | 0.686179 | 3     | 3     | 3     |
| 51    | 0.676932 | 3     | 3     | 3     |
| 52    | 0.717674 | 3     | 3     | 3     |
| 53    | 0.71724  | 3     | 3     | 3     |
| 54    | 0.706652 | 3     | 3     | 3     |
| 55    | 0.727551 | 3     | 3     | 3     |
| 56    | 0.693127 | 3     | 3     | 3     |
| 57    | 0.698628 | 3     | 3     | 3     |
| 58    | 0.694626 | 3     | 3     | 3     |
| 59    | 0.712241 | 3     | 3     | 3     |
| 60    | 0.702327 | 3     | 3     | 3     |
| 61    | 0.738817 | 3     | 4     | 4     |
| 62    | 0.697047 | 3     | 3     | 3     |
| 63    | 0.703265 | 3     | 3     | 3     |
| 64    | 0.695619 | 3     | 3     | 3     |
| 65    | 0.7289   | 3     | 3     | 3     |
| 66    | 0.681052 | 3     | 3     | 3     |
| 67    | 0.705302 | 3     | 3     | 3     |
| 68    | 0.743617 | 3     | 4     | 4     |
| 69    | 0.701689 | 3     | 3     | 3     |
| 70    | 0.741541 | 3     | 4     | 4     |
| 71    | 0.690167 | 3     | 3     | 3     |
| 72    | 0.715671 | 3     | 3     | 3     |
| 73    | 0.700659 | 3     | 3     | 3     |
| 74    | 0.708459 | 3     | 3     | 3     |
| 75    | 0.68812  | 3     | 3     | 3     |
| 76    | 0.68865  | 3     | 3     | 3     |
| 77    | 0.708334 | 3     | 3     | 3     |
| 78    | 0.714843 | 3     | 3     | 3     |
| 79    | 0.684333 | 3     | 3     | 3     |
| 80    | 0.737373 | 3     | 4     | 4     |
| 81    | 0.706032 | 3     | 3     | 3     |
| 82    | 0.719959 | 3     | 3     | 3     |
| 83    | 0.699843 | 3     | 3     | 3     |
| 84    | 0.713832 | 3     | 3     | 3     |
| 85    | 0.683832 | 3     | 3     | 3     |
| 86    | 0.730886 | 3     | 4     | 4     |
| 87    | 0.686249 | 3     | 3     | 3     |
| 88    | 0.67803  | 3     | 3     | 3     |
| 89    | 0.738657 | 3     | 4     | 4     |
| 90    | 0.692246 | 3     | 3     | 3     |
| 91    | 0.704324 | 3     | 3     | 3     |
| 92    | 0.731277 | 3     | 4     | 4     |
| 93    | 0.708845 | 4     | 2     | 2     |
| 94    | 0.723114 | 4     | 2     | 2     |
| 95    | 0.712402 | 4     | 2     | 2     |
| 96    | 0.726118 | 4     | 2     | 2     |
| 97    | 0.716326 | 4     | 2     | 2     |
| 98    | 0.715104 | 4     | 2     | 2     |
| 99    | 0.702283 | 4     | 2     | 2     |
| 100   | 0.738795 | 4     | 4     | 4     |
| 101   | 0.696267 | 4     | 2     | 2     |
| 102   | 0.715508 | 4     | 2     | 2     |
| 103   | 0.750291 | 4     | 4     | 4     |
| 104   | 0.720186 | 4     | 2     | 2     |
| 105   | 0.743154 | 4     | 4     | 4     |
| 106   | 0.69713  | 4     | 2     | 2     |
| 107   | 0.734544 | 4     | 4     | 4     |
| 108   | 0.715887 | 4     | 2     | 2     |
| 109   | 0.709213 | 4     | 2     | 2     |
| 110   | 0.706736 | 4     | 3     | 3     |
| 111   | 0.701736 | 4     | 3     | 3     |
| 112   | 0.71929  | 4     | 2     | 2     |
| 113   | 0.726033 | 4     | 4     | 4     |
| 114   | 0.70827  | 4     | 3     | 3     |
| 115   | 0.734373 | 4     | 4     | 4     |
| 116   | 0.714509 | 4     | 3     | 3     |
| 117   | 0.729064 | 4     | 4     | 4     |
| 118   | 0.71385  | 4     | 3     | 3     |
| 119   | 0.70901  | 4     | 3     | 3     |
| 120   | 0.702347 | 4     | 3     | 3     |
| 121   | 0.730077 | 4     | 4     | 4     |
| 122   | 0.698373 | 4     | 3     | 3     |
| 123   | 0.697997 | 4     | 3     | 3     |
| 124   | 0.728784 | 4     | 4     | 4     |
| 125   | 0.703672 | 4     | 3     | 3     |
| 126   | 0.717529 | 4     | 3     | 3     |
| 127   | 0.728916 | 4     | 4     | 4     |
| 128   | 0.702338 | 4     | 3     | 3     |
| 129   | 0.704821 | 4     | 3     | 3     |
| 130   | 0.738667 | 4     | 4     | 4     |
| 131   | 0.696143 | 4     | 3     | 3     |
| 132   | 0.713386 | 4     | 4     | 4     |
| 133   | 0.74625  | 4     | 4     | 4     |
| 134   | 0.696568 | 4     | 3     | 3     |
| 135   | 0.74617  | 4     | 4     | 4     |
| 136   | 0.705975 | 4     | 4     | 4     |
| 137   | 0.723566 | 4     | 4     | 4     |
| 138   | 0.70828  | 4     | 3     | 3     |
| 139   | 0.738999 | 4     | 4     | 4     |
| 140   | 0.697198 | 4     | 3     | 3     |
| 141   | 0.739767 | 4     | 4     | 4     |
| 142   | 0.688947 | 4     | 3     | 3     |
| 143   | 0.71693  | 4     | 4     | 4     |
| 144   | 0.744002 | 4     | 4     | 4     |
| 145   | 0.692246 | 4     | 3     | 3     |
| 146   | 0.74317  | 4     | 4     | 4     |
| 147   | 0.743511 | 4     | 4     | 4     |
| 148   | 0.709128 | 4     | 3     | 3     |
| 149   | 0.711323 | 4     | 3     | 3     |
| 150   | 0.695991 | 4     | 3     | 3     |
| 151   | 0.736305 | 4     | 4     | 4     |
| 152   | 0.73079  | 4     | 3     | 3     |
| 153   | 0.695806 | 4     | 3     | 3     |
| 154   | 0.740155 | 4     | 4     | 4     |
| 155   | 0.699725 | 4     | 3     | 3     |
| 156   | 0.713345 | 4     | 3     | 3     |
| 157   | 0.740282 | 4     | 4     | 4     |
| 158   | 0.738998 | 4     | 4     | 4     |
| 159   | 0.688465 | 4     | 3     | 3     |
| 160   | 0.702306 | 4     | 3     | 3     |
| 161   | 0.728236 | 4     | 4     | 4     |
| 162   | 0.738699 | 4     | 4     | 4     |
| 163   | 0.728822 | 5     | 3     | 3     |
| 164   | 0.709092 | 5     | 3     | 3     |
| 165   | 0.740915 | 5     | 4     | 4     |
| 166   | 0.713635 | 5     | 3     | 3     |
| 167   | 0.723362 | 5     | 3     | 3     |
| 168   | 0.754651 | 5     | 4     | 4     |
| 169   | 0.71776  | 5     | 3     | 3     |
| 170   | 0.743345 | 5     | 4     | 4     |
| 171   | 0.713167 | 5     | 3     | 3     |
| 172   | 0.74036  | 5     | 4     | 4     |
| 173   | 0.71526  | 5     | 3     | 3     |
| 174   | 0.749745 | 5     | 4     | 4     |
| 175   | 0.71591  | 5     | 3     | 3     |
| 176   | 0.740499 | 5     | 4     | 4     |
| 177   | 0.699444 | 5     | 3     | 3     |
| 178   | 0.750481 | 5     | 4     | 4     |
| 179   | 0.749588 | 5     | 4     | 4     |
| 180   | 0.708604 | 5     | 3     | 3     |
| 181   | 0.754086 | 5     | 4     | 4     |
| 182   | 0.748573 | 5     | 4     | 4     |
| 183   | 0.719242 | 5     | 3     | 3     |
| 184   | 0.71768  | 5     | 3     | 3     |
| 185   | 0.708528 | 5     | 3     | 3     |
| 186   | 0.73375  | 5     | 4     | 4     |
| 187   | 0.71369  | 5     | 3     | 3     |
| 188   | 0.71300  | 5     | 3     | 3     |
| 189   | 0.73823  | 5     | 4     | 4     |
| 190   | 0.71585  | 5     | 3     | 3     |
| 191   | 0.71967  | 5     | 3     | 3     |
| 192   | 0.741318 | 5     | 4     | 4     |
| 193   | 0.739125 | 5     | 4     | 4     |
| 194   | 0.703831 | 5     | 3     | 3     |
| 195   | 0.711958 | 5     | 3     | 3     |
| 196   | 0.725947 | 5     | 4     | 4     |
| 197   | 0.734185 | 5     | 4     | 4     |
| 198   | 0.711032 | 5     | 3     | 3     |
| 199   | 0.74306  | 5     | 4     | 4     |
| 200   | 0.695696 | 5     | 3     | 3     |
| 201   | 0.741916 | 5     | 3     | 3     |
| 202   | 0.704001 | 5     | 3     | 3     |
| 203   | 0.733025 | 5     | 4     | 4     |
| 204   | 0.747242 | 5     | 4     | 4     |
| 205   | 0.698377 | 5     | 3     | 3     |
| 206   | 0.741758 | 5     | 4     | 4     |
| 207   | 0.743966 | 5     | 4     | 4     |
| 208   | 0.745428 | 5     | 4     | 4     |
| 209   | 0.692232 | 5     | 3     | 3     |
| 210   | 0.736648 | 5     | 4     | 4     |
| 211   | 0.73948  | 5     | 4     | 4     |
| 212   | 0.74558  | 5     | 4     | 4     |
| 213   | 0.738362 | 5     | 4     | 4     |
| 214   | 0.699926 | 5     | 3     | 3     |
| 215   | 0.706619 | 5     | 3     | 3     |
| 216   | 0.736222 | 5     | 4     | 4     |
| 217   | 0.738858 | 5     | 4     | 4     |
| 218   | 0.73596  | 5     | 4     | 4     |
| 219   | 0.721274 | 6     | 3     | 3     |
| 220   | 0.751748 | 6     | 4     | 4     |
| 221   | 0.717134 | 6     | 3     | 3     |
| 222   | 0.741916 | 6     | 4     | 4     |
| 223   | 0.711378 | 6     | 3     | 3     |
| 224   | 0.741487 | 6     | 4     | 4     |
| 225   | 0.753494 | 6     | 4     | 4     |
| 226   | 0.719193 | 6     | 3     | 3     |
| 227   | 0.750175 | 6     | 4     | 4     |
| 228   | 0.743647 | 6     | 4     | 4     |
| 229   | 0.751538 | 6     | 4     | 4     |
| 230   | 0.706614 | 6     | 3     | 3     |
| 231   | 0.751931 | 6     | 4     | 4     |
| 232   | 0.742862 | 6     | 4     | 4     |
| 233   | 0.749908 | 6     | 4     | 4     |
| 234   | 0.737929 | 6     | 4     | 4     |
| 235   | 0.718429 | 6     | 3     | 3     |
| 236   | 0.719231 | 6     | 3     | 3     |
| 237   | 0.738642 | 6     | 4     | 4     |
| 238   | 0.737818 | 6     | 4     | 4     |
| 239   | 0.734713 | 6     | 4     | 4     |
| 240   | 0.742956 | 6     | 4     | 4     |
| 241   | 0.703867 | 6     | 3     | 3     |
| 242   | 0.740172 | 6     | 4     | 4     |
| 243   | 0.742046 | 6     | 4     | 4     |
| 244   | 0.745471 | 6     | 4     | 4     |
| 245   | 0.745548 | 6     | 4     | 4     |
| 246   | 0.738088 | 6     | 4     | 4     |
| 247   | 0.752571 | 7     | 4     | 4     |
| 248   | 0.717821 | 7     | 3     | 3     |
| 249   | 0.73064  | 7     | 4     | 4     |
| 250   | 0.743606 | 7     | 4     | 4     |
| 251   | 0.750017 | 7     | 4     | 4     |
| 252   | 0.750289 | 7     | 4     | 4     |
| 253   | 0.738684 | 7     | 4     | 4     |
| 254   | 0.744572 | 7     | 4     | 4     |
| 255   | 0.750518 | 8     | 4     | 4     |
